# Supplementary material for: Supramolecular frameworks based on [60]fullerene hexakisadducts
Source: PubMed Central journal article supplement (PMC5238557; doi:10.3762/bjoc.13.1), 2017-01-02
Supplement: Beilstein_J_Org_Chem-13-01-s001.pdf [file Beilstein_J_Org_Chem-13-01-s001.pdf]

# Supporting Information

for

## Supramolecular frameworks based on [60]fullerene hexakisadducts

Andreas Kraft<sup>1</sup>, Johannes Stangl<sup>2</sup>, Ana-Maria Krause<sup>1</sup>, Klaus Müller-Buschbaum<sup>2</sup>

and Florian Beuerle<sup>1\*§</sup>

Address: <sup>1</sup>Institut für Organische Chemie & Center for Nanosystems Chemistry, Universität Würzburg, Am Hubland, 97074 Würzburg, Germany and <sup>2</sup>Institut für Anorganische Chemie, Universität Würzburg, Am Hubland, 97074 Würzburg, Germany

Email: Florian Beuerle - [florian.beuerle@uni-wuerzburg.de](mailto:florian.beuerle@uni-wuerzburg.de)

<sup>§</sup>Tel.: +49 931 31-83603

\*Corresponding author

### **Analytical and crystallographic data; SEM, BET, PXRD and TGA/DTA data**

#### **Content**

|                                   |     |
|-----------------------------------|-----|
| 1 Analytical data                 | S2  |
| 2 Crystallographic data           | S6  |
| 3 Electron microscopy (SEM)       | S12 |
| 4 Sorption study (BET)            | S13 |
| 5 Powder X-ray diffraction (PXRD) | S14 |
| 6 TGA/DTA study                   | S16 |

## 1 Analytical data

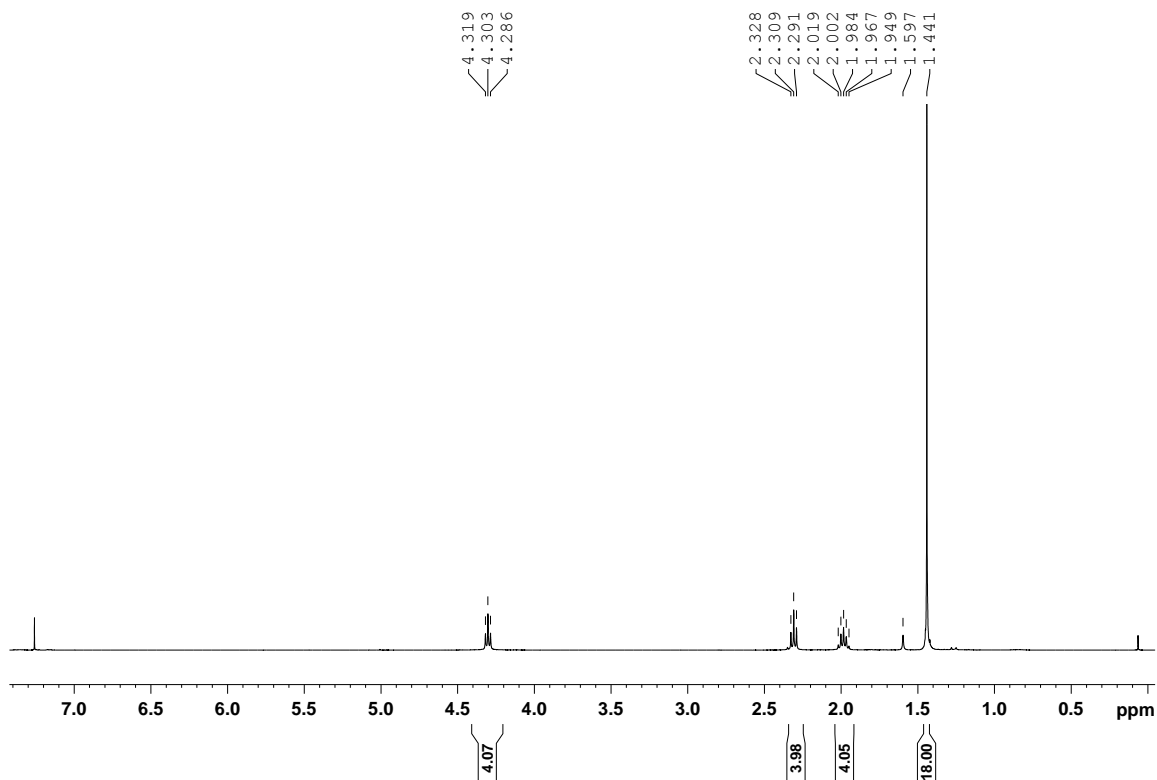

**Figure S1:**  $^1\text{H}$  NMR (400 MHz,  $\text{CDCl}_3$ , rt) for hexakisadduct **2**.

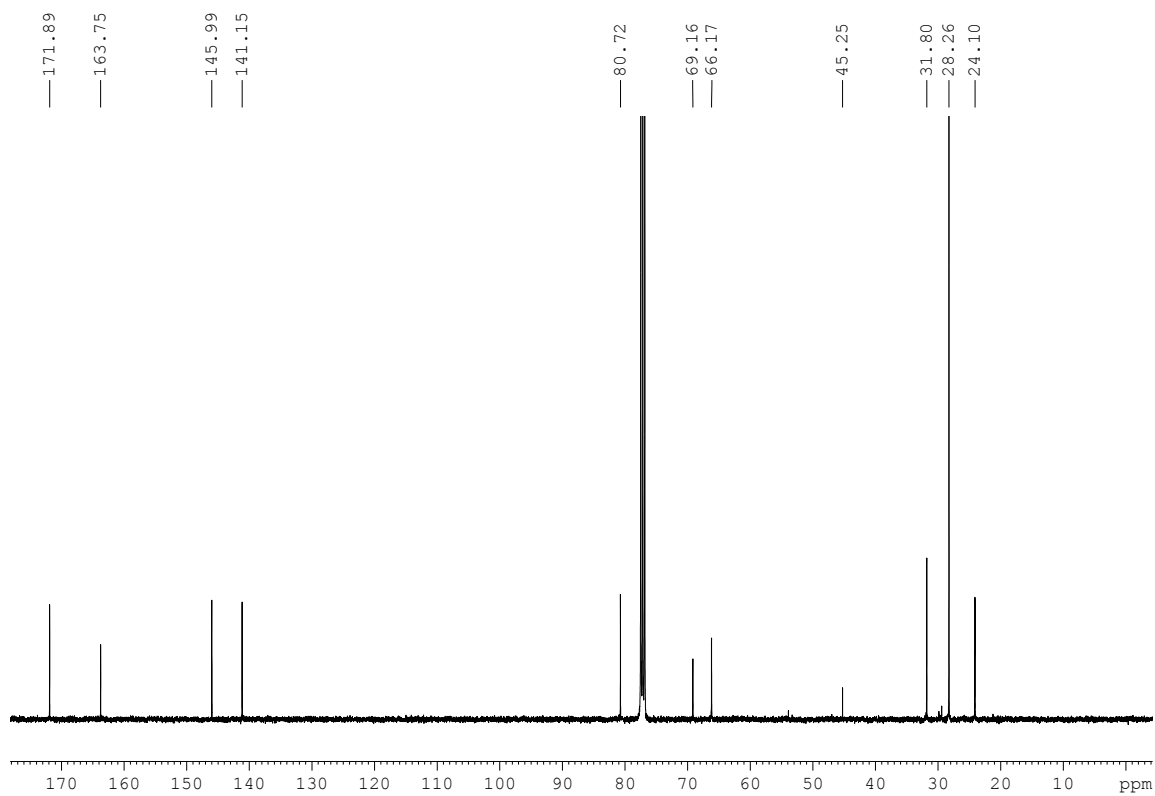

**Figure S2:**  $^{13}\text{C}$  NMR (100 MHz,  $\text{CDCl}_3$ , rt) for hexakisadduct **2**.

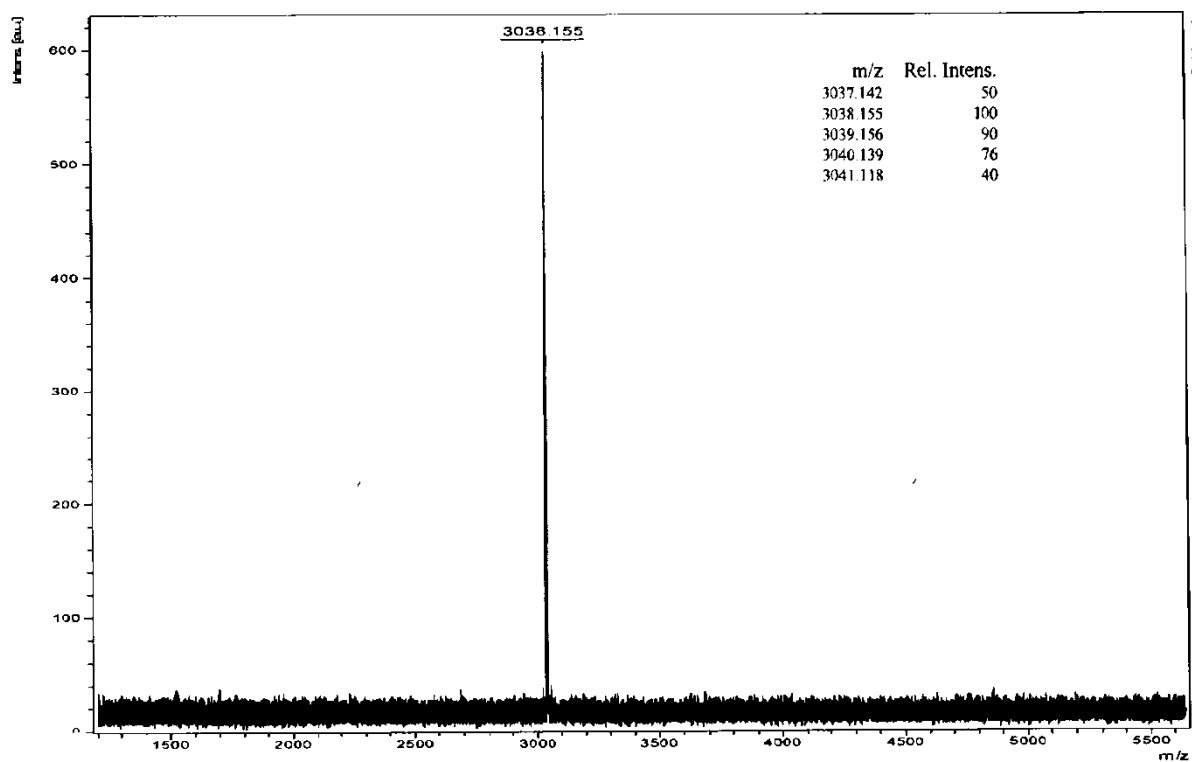

**Figure S3:** MS (MALDI, DCTB, pos) for hexakisadduct **2**.

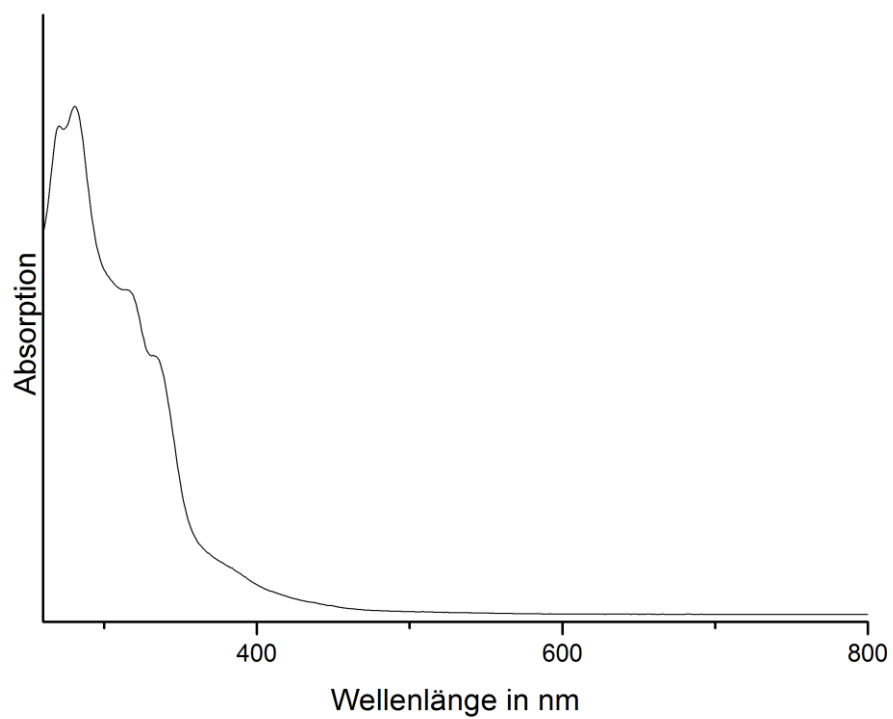

**Figure S4:** UV-vis ( $\text{CH}_2\text{Cl}_2$ , rt) for hexakisadduct **2**.

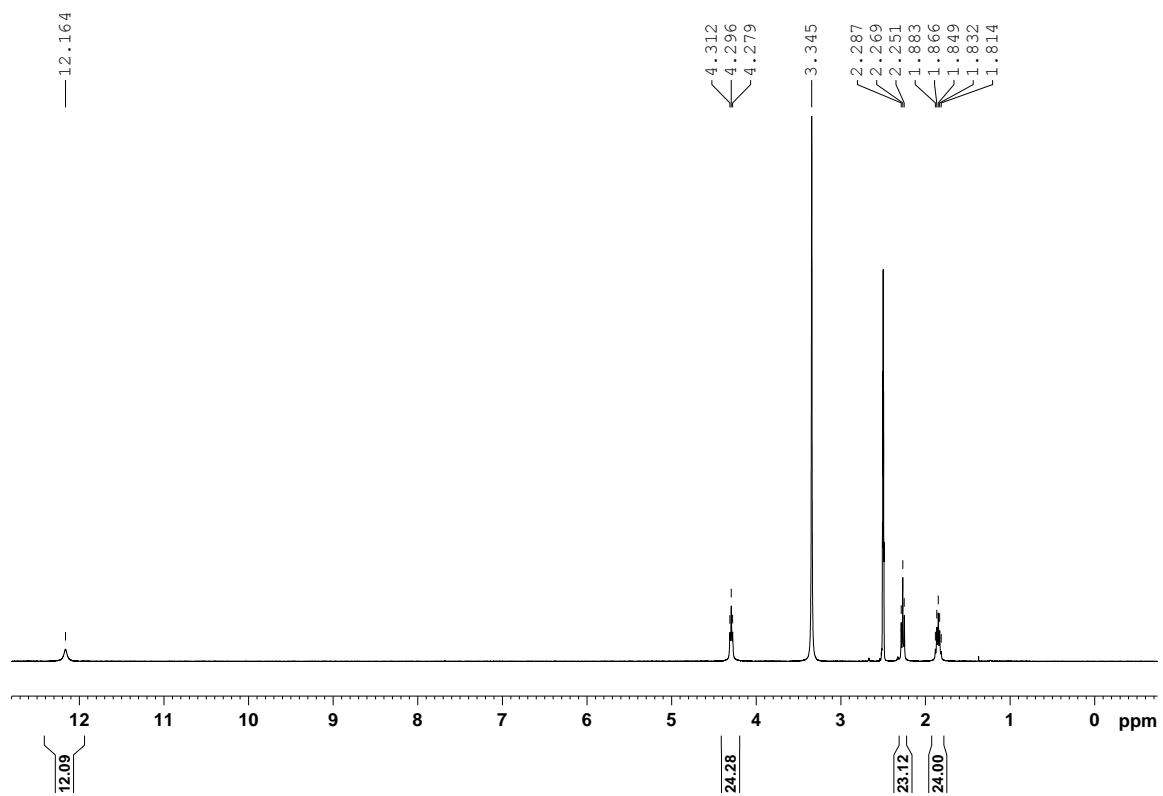

**Figure S5:**  $^1\text{H}$  NMR (400 MHz,  $\text{DMSO-}d_6$ , rt) for hexakisadduct **C4**.

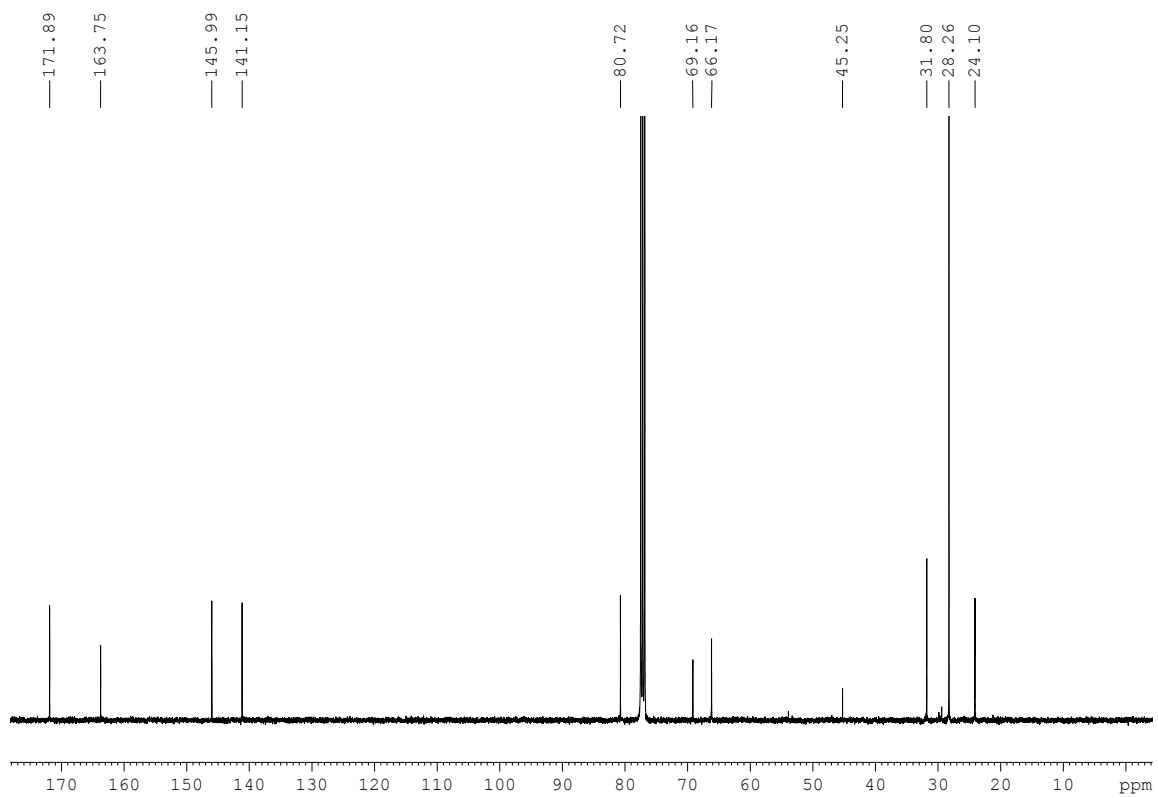

**Figure S6:**  $^{13}\text{C}$  NMR (100 MHz,  $\text{DMSO-}d_6$ , rt) for hexakisadduct **C4**.

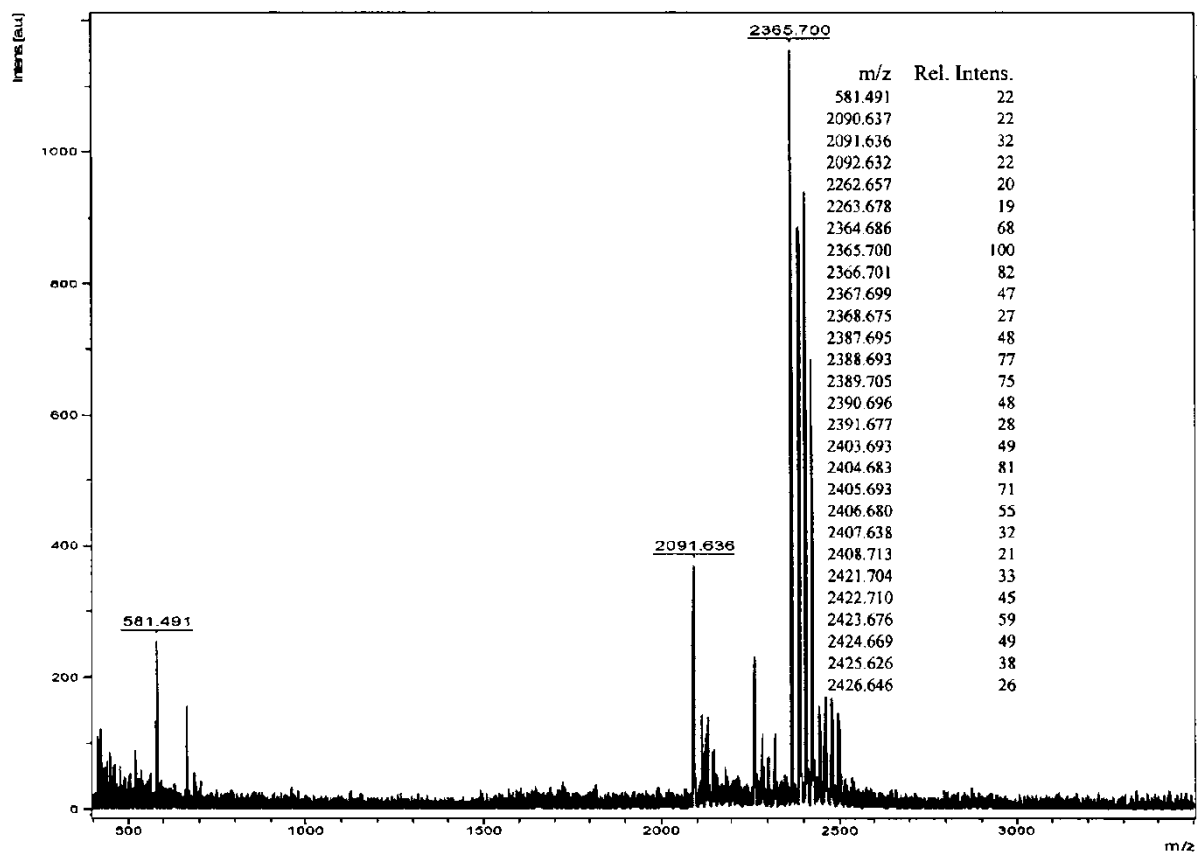

**Figure S7:** MS (MALDI, DCTB, pos) for hexakisadduct C4.

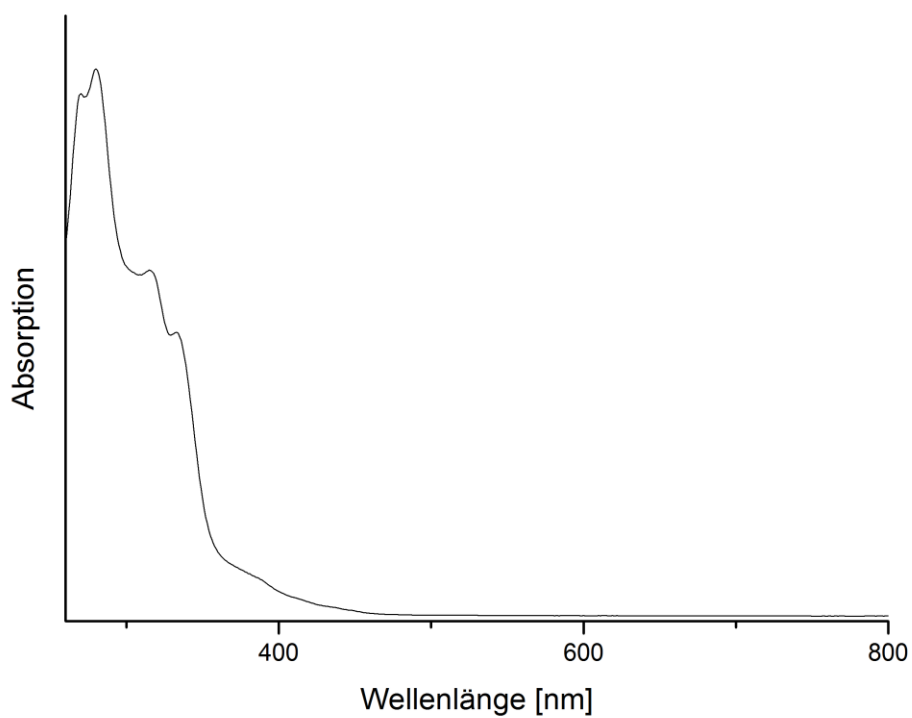

**Figure S8:** UV-vis (MeOH, rt) for hexakisadduct C4.

## 2 Crystallographic data

Single crystals were mounted on a 100  $\mu\text{m}$  MiTeGen MicroLoop using perfluorinated polyalkylether. Single crystal X-ray diffraction data were collected on a Bruker D8 Quest Kappa diffractometer with a Photon100 CMOS detector and multi-layered mirror monochromated  $\text{CuK}\alpha$  radiation. The images were processed with the Bruker software packages and equivalent reflections were merged. The data were corrected for absorption effects using semi-empirical methods from equivalents. Corrections for Lorentz and polarization effects were applied. The structures were solved by direct methods, refined with the SHELXTL software package (G. Sheldrick, *Acta Crystallogr. Sect. A*, 2008, **64**, 112) and expanded using Fourier techniques. All non-hydrogen atoms were refined anisotropically. Hydrogen atoms were assigned to geometrically idealized positions and were included in structure factor calculations.

### Crystal data and refinement details for HFF-2:

Suitable crystals for X-ray diffraction have been obtained by slow vapor deposition of  $\text{Et}_2\text{O}$  into a solution of **C3** in EtOH. Supplementary crystallographic data for **HFF-2** can be obtained free of charge from The Cambridge Crystallographic Data Centre via [www.ccdc.cam.ac.uk/data\\_request/cif](http://www.ccdc.cam.ac.uk/data_request/cif) (CCDC 1498265).

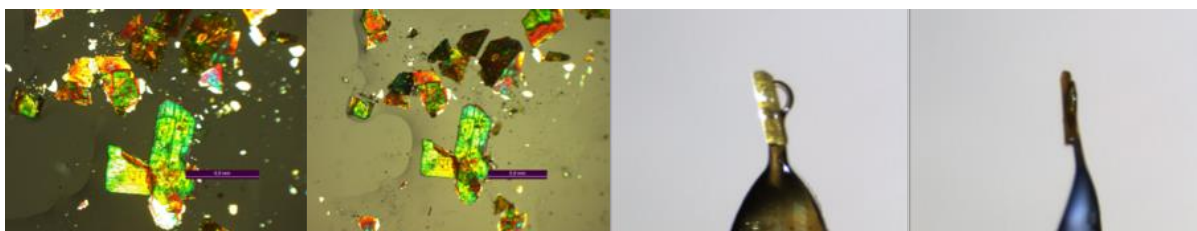

### Crystal data and refinement details for HFF-3:

Suitable crystals for X-ray diffraction have been obtained by slow vapor deposition of  $\text{Et}_2\text{O}$  into a solution of **C4** in EtOH.  $\text{Et}_2\text{O}$  molecules in the pores are disordered (main site occupancy 57%). Supplementary crystallographic data for **HFF-3** can be obtained free of charge from The Cambridge Crystallographic Data Centre via [www.ccdc.cam.ac.uk/data\\_request/cif](http://www.ccdc.cam.ac.uk/data_request/cif) (CCDC 1498266).

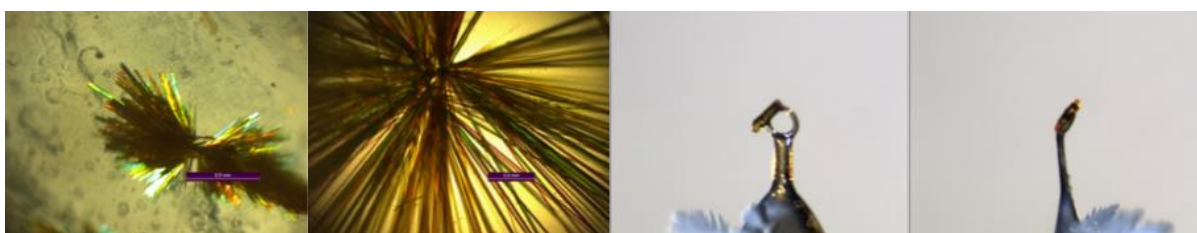

**Table S1:** Crystal data and structure refinement for **HFF-2**.

|                                          |                                                                                                                                                    |
|------------------------------------------|----------------------------------------------------------------------------------------------------------------------------------------------------|
| Empirical formula                        | $C_{114}H_{60}O_{48} \cdot 4 C_4H_{10}O$                                                                                                           |
| Formula weight                           | 2494.09 g mol <sup>-1</sup>                                                                                                                        |
| Temperature                              | 100(2) K                                                                                                                                           |
| Wavelength                               | 1.54178 Å                                                                                                                                          |
| Crystal system, space group              | Triclinic, $P\bar{1}$ (Nr. 2)                                                                                                                      |
| Unit cell dimensions                     | $a = 13.1513(5)$ Å, $\alpha = 107.332(3)^\circ$<br>$b = 14.4631(7)$ Å, $\beta = 95.752(3)^\circ$<br>$c = 15.2117(7)$ Å, $\gamma = 94.594(2)^\circ$ |
| Volume                                   | 2729.6(2) Å <sup>3</sup>                                                                                                                           |
| Z, calculated density                    | 1, 1.517 g cm <sup>-3</sup>                                                                                                                        |
| Absorption coefficient                   | 1.010 mm <sup>-1</sup>                                                                                                                             |
| F(000)                                   | 1296                                                                                                                                               |
| Crystal size                             | 0.453 x 0.044 x 0.028 mm <sup>3</sup>                                                                                                              |
| $\theta$ range for data collection       | 3.069 to 74.700°                                                                                                                                   |
| Limiting indices                         | $-16 \leq h \leq 12$ , $-18 \leq k \leq 18$ , $-19 \leq l \leq 19$                                                                                 |
| Reflections collected / unique           | 42237 / 11068 [ $R_{int} = 0.0346$ ]                                                                                                               |
| Completeness to $\theta = 67.679$        | 99.6%                                                                                                                                              |
| Absorption correction                    | Semi-empirical from equivalents                                                                                                                    |
| Max. and min. transmission               | 0.7538 and 0.6426                                                                                                                                  |
| Refinement method                        | Full-matrix least-squares on $F^2$                                                                                                                 |
| Data / restraints / parameters           | 11068 / 0 / 830                                                                                                                                    |
| Goodness-of-fit on $F^2$                 | 1.040                                                                                                                                              |
| Final $R$ indices [ $I > 2(\sigma(I))$ ] | $R_1 = 0.0490$ , $wR_2 = 0.1302$                                                                                                                   |
| $R$ indices (all data)                   | $R_1 = 0.0622$ , $wR_2 = 0.1398$                                                                                                                   |
| Largest diff. peak and hole              | 0.561 and $-0.584$ e Å <sup>-3</sup>                                                                                                               |

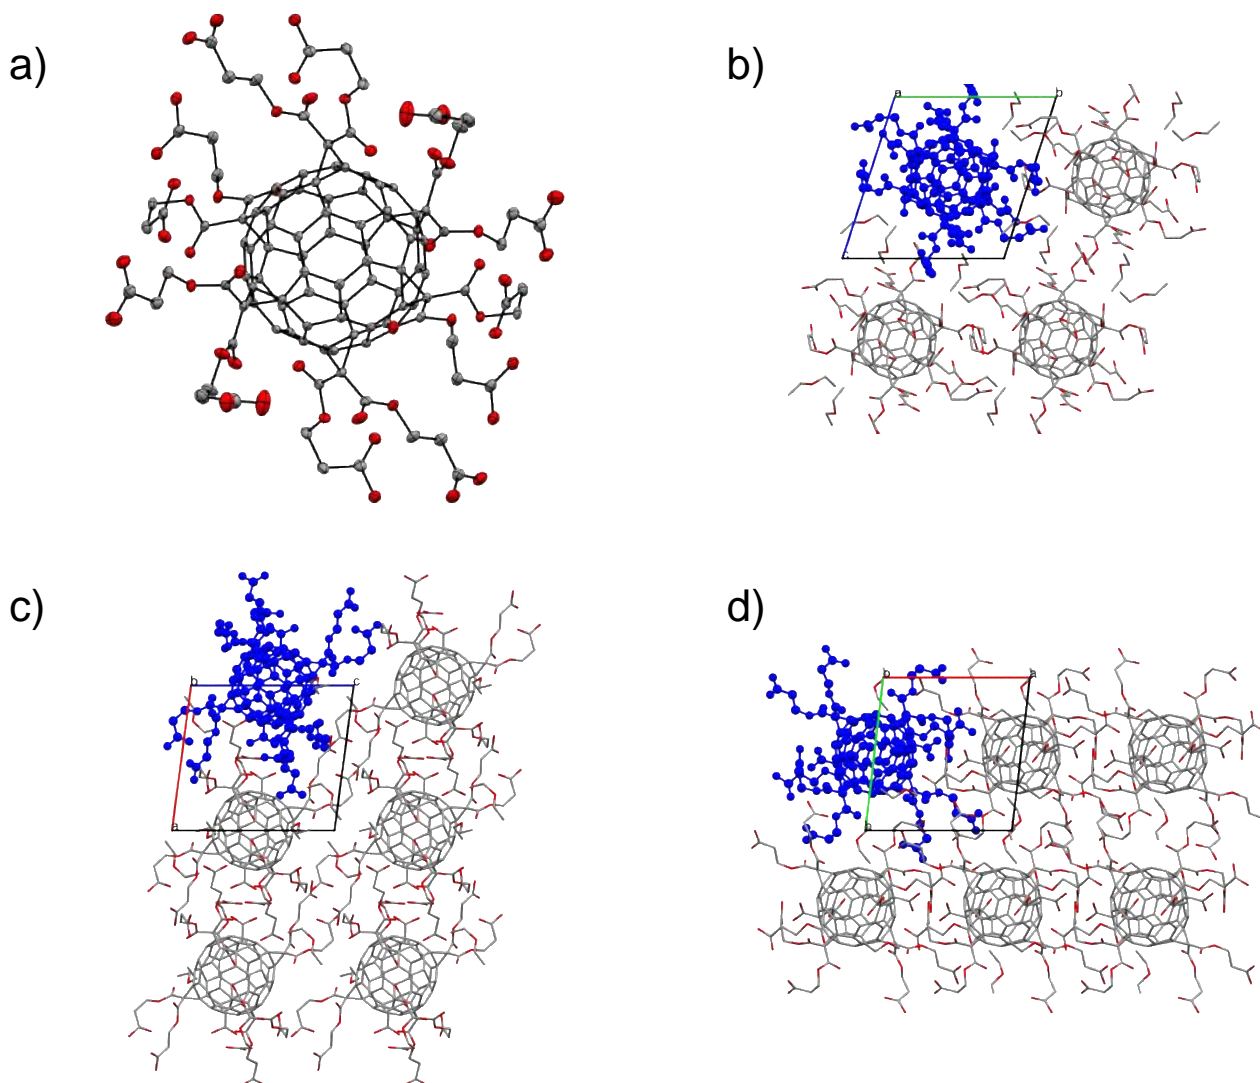

**Figure S9:** Single-crystal X-ray structure of **HFF-2**: a) ORTEP representation of single molecule of **C3** (thermal ellipsoids set to 50% probability, carbon grey, oxygen red, hydrogen atoms omitted for clarity); crystal packing with views along the crystallographic b) a, c) b and d) c axis (single molecule of **C3** is highlighted in blue).



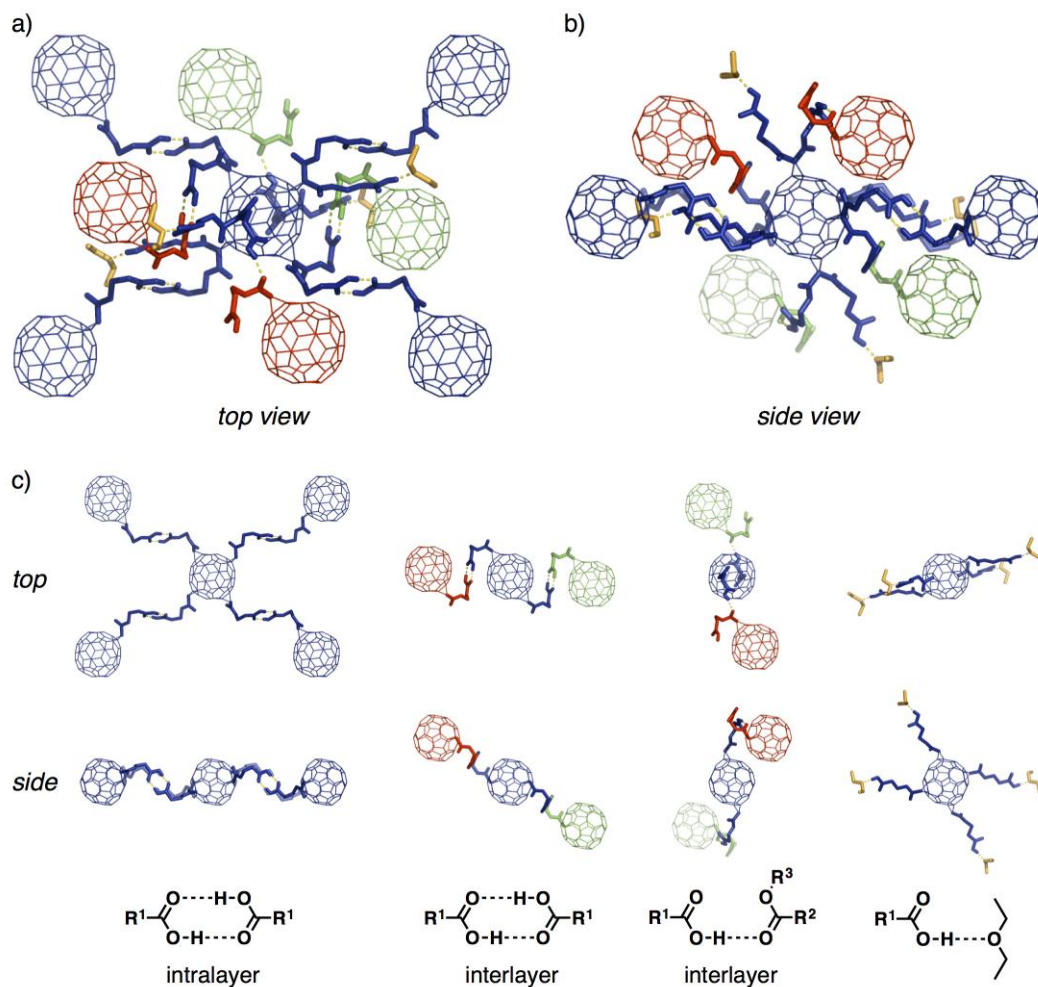

**Figure S10:** Hydrogen bonding motifs for **HFF-2**: a) top and b) side view of hydrogen bonding interactions for one molecule of **C3**; c) different types of hydrogen bonds observed in **HFF-2**; *color code: layer A red, layer B blue, layer C green, Et<sub>2</sub>O orange, hydrogen bonds yellow; non-participating side arms and non polar hydrogen atoms omitted for clarity.*

**Table S2:** Crvstal data and structure refinement for **HFF-3**.

|                                          |                                                                                                                              |
|------------------------------------------|------------------------------------------------------------------------------------------------------------------------------|
| Empirical formula                        | $C_{126}H_{84}O_{48} \cdot 6 C_4H_{10}O$                                                                                     |
| Formula weight                           | 2810.64 g mol <sup>-1</sup>                                                                                                  |
| Temperature                              | 100(2) K                                                                                                                     |
| Wavelength                               | 1.54178 Å                                                                                                                    |
| Crystal system, space group              | Trigonal, $R\bar{3}$ (Nr. 148)                                                                                               |
| Unit cell dimensions                     | $a = 33.8114(9)$ Å, $\alpha = 90^\circ$<br>$b = 33.8114(9)$ Å, $\beta = 90^\circ$<br>$c = 9.8056(3)$ Å, $\gamma = 120^\circ$ |
| Volume                                   | 9708.0(6) Å <sup>3</sup>                                                                                                     |
| Z, calculated density                    | 3, 1.442 g cm <sup>-3</sup>                                                                                                  |
| Absorption coefficient                   | 0.927 mm <sup>-1</sup>                                                                                                       |
| F(000)                                   | 4428                                                                                                                         |
| Crystal size                             | 0.194 x 0.059 x 0.032 mm <sup>3</sup>                                                                                        |
| $\theta$ range for data collection       | 2.614 to 75.142°                                                                                                             |
| Limiting indices                         | $-40 \leq h \leq 42$ , $-42 \leq k \leq 42$ , $-12 \leq l \leq 12$                                                           |
| Reflections collected / unique           | 44836 / 4438 [ $R_{int} = 0.0442$ ]                                                                                          |
| Completeness to $\theta = 67.679$        | 100%                                                                                                                         |
| Absorption correction                    | Semi-empirical from equivalents                                                                                              |
| Max. and min. transmission               | 0.7538 and 0.6709                                                                                                            |
| Refinement method                        | Full-matrix least-squares on $F^2$                                                                                           |
| Data / restraints / parameters           | 4438 / 0 / 350                                                                                                               |
| Goodness-of-fit on $F^2$                 | 1.066                                                                                                                        |
| Final $R$ indices [ $I > 2(\sigma(I))$ ] | $R_1 = 0.0488$ , $wR_2 = 0.1414$                                                                                             |
| $R$ indices (all data)                   | $R_1 = 0.0556$ , $wR_2 = 0.1471$                                                                                             |
| Largest diff. peak and hole              | 0.419 and $-0.424$ e Å <sup>-3</sup>                                                                                         |

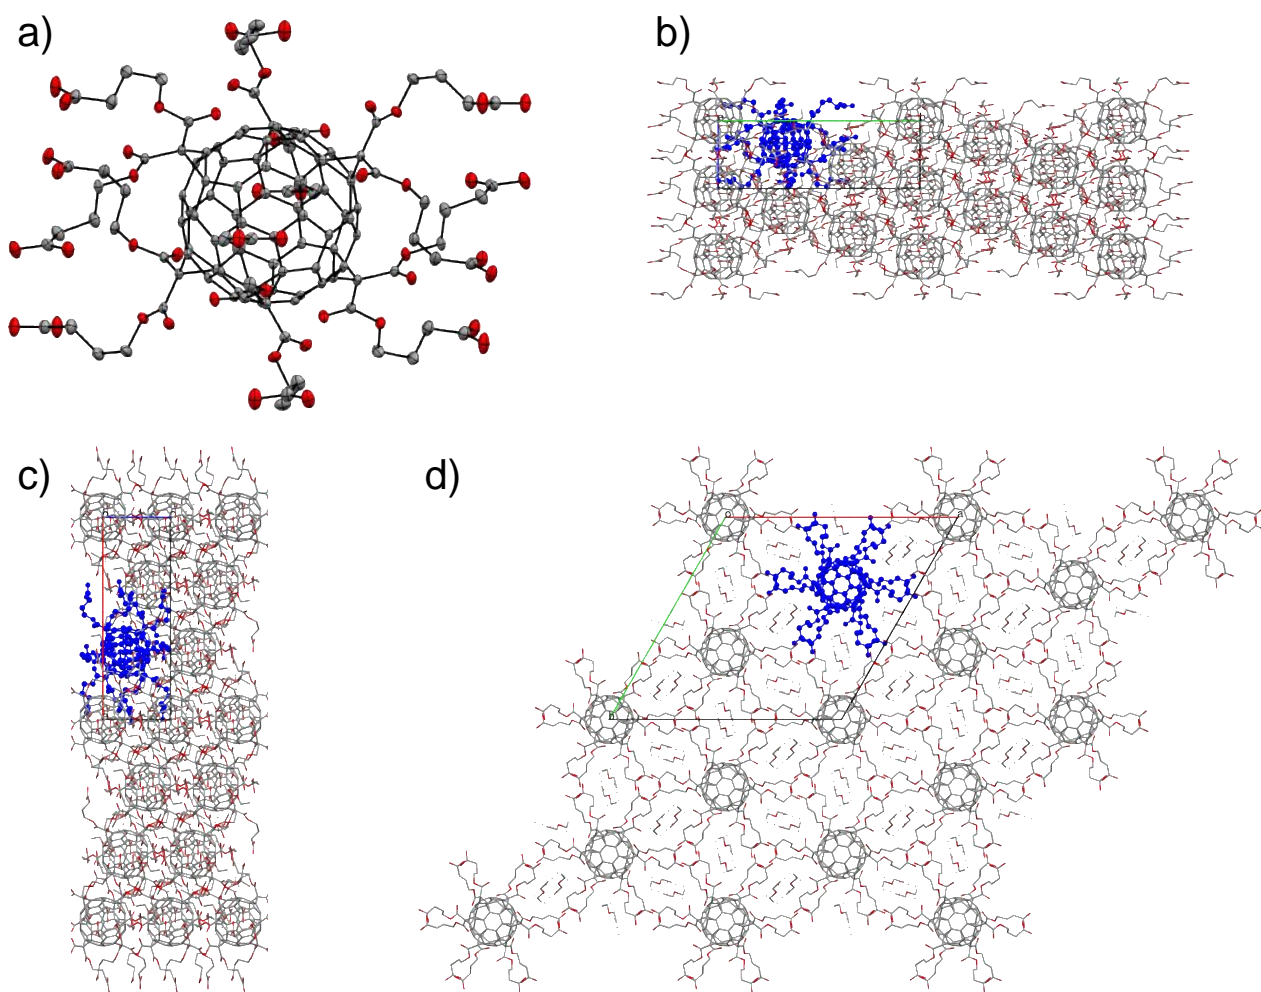

**Figure S11:** Single-crystal X-ray structure of **HFF-3**: a) ORTEP representation of single molecule of **C4** (thermal ellipsoids set to 50% probability, carbon grey, oxygen red, hydrogen atoms omitted for clarity); crystal packing with views along the crystallographic b) a, c) b and d) c axis (single molecule of **C4** is highlighted in blue).

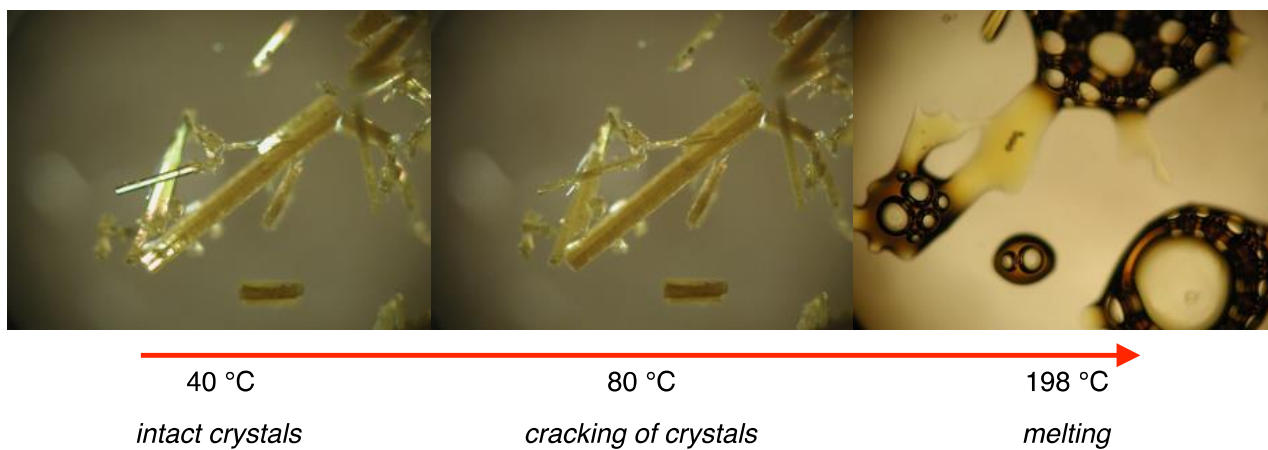

**Figure S12:** Thermal behavior of crystalline **HFF-3** under ambient conditions.

### 3 Electron microscopy (SEM)

Morphological investigations were determined on a field emission scanning electron microscope (FE-SEM) ULTRA plus (Zeiss) with a GEMINI e-beam column at 5 kV.

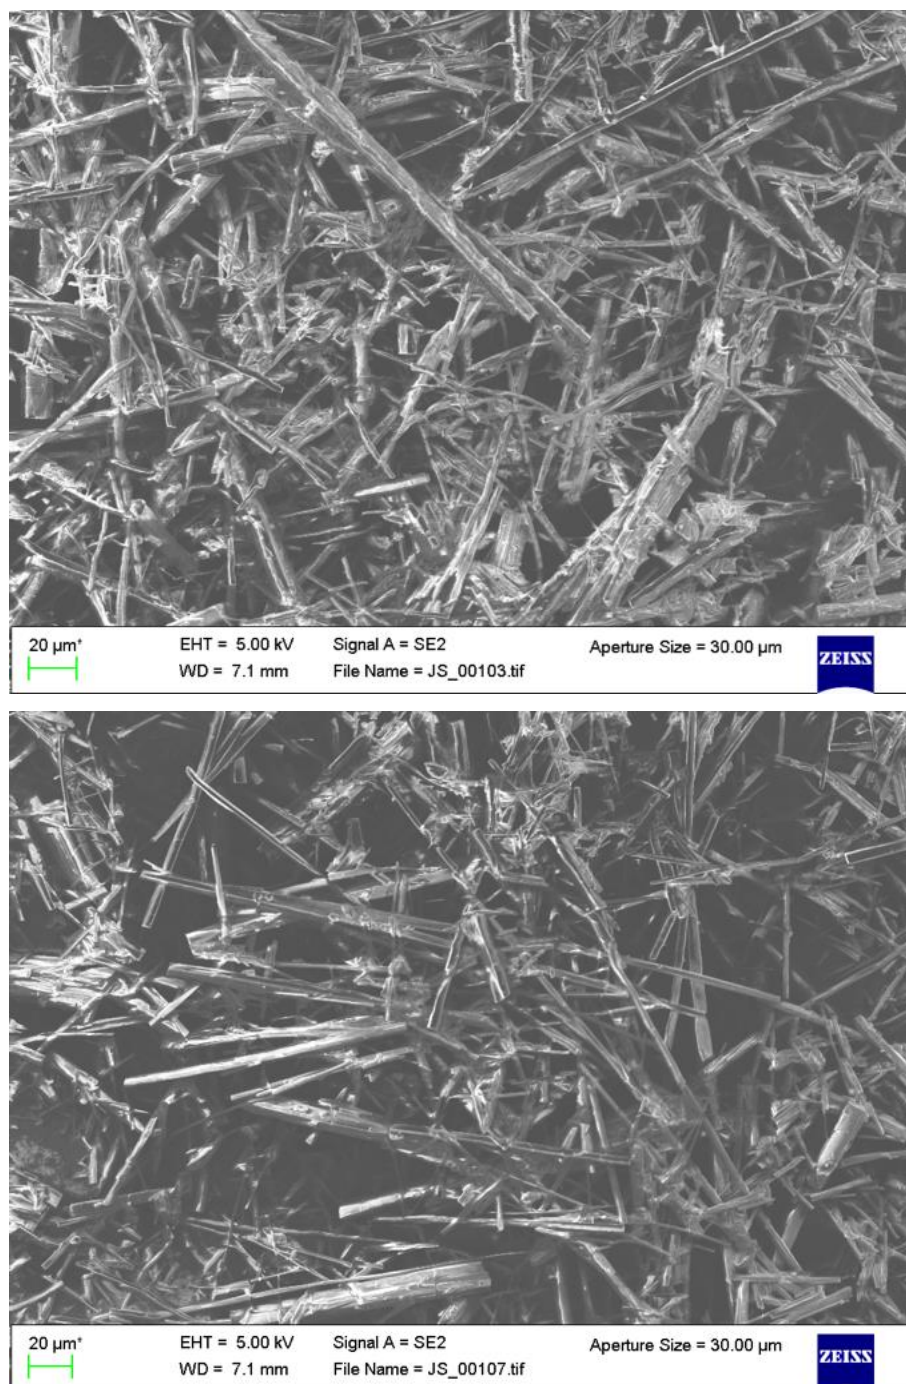

**Figure S13:** SEM images of **HFF-3** as-synthesized (top) and subsequent to activation (bottom) indicating the strong anisotropic crystal habitus, which does not change upon activation.

## 4 Sorption study (BET)

All sorption experiments were carried out on a Quantachrome Autosorb AS-1C. N<sub>2</sub> (Linde Gas, purity > 99.999%) and Ar (Linde Gas, purity > 99.999%) physisorption were determined at 77 K with dynamic p<sub>0</sub>-determination via a p<sub>0</sub>-cell at p = 760 mmHg. Analysis and interpretation of data were done with the Quantachrome AS1Win software package, version 2.11. HFF-3 samples were activated at room temperature and at 70 °C with pressures of 2.0 × 10<sup>-3</sup> mbar and 1 × 10<sup>-6</sup> mbar for 24 h, each. All samples were treated in the outgas station, until outgassing rates were at least below 2 microns/minute in pressure increase and afterwards loaded with He (Linde Gas, purity > 99.999%) before analysis was carried out.

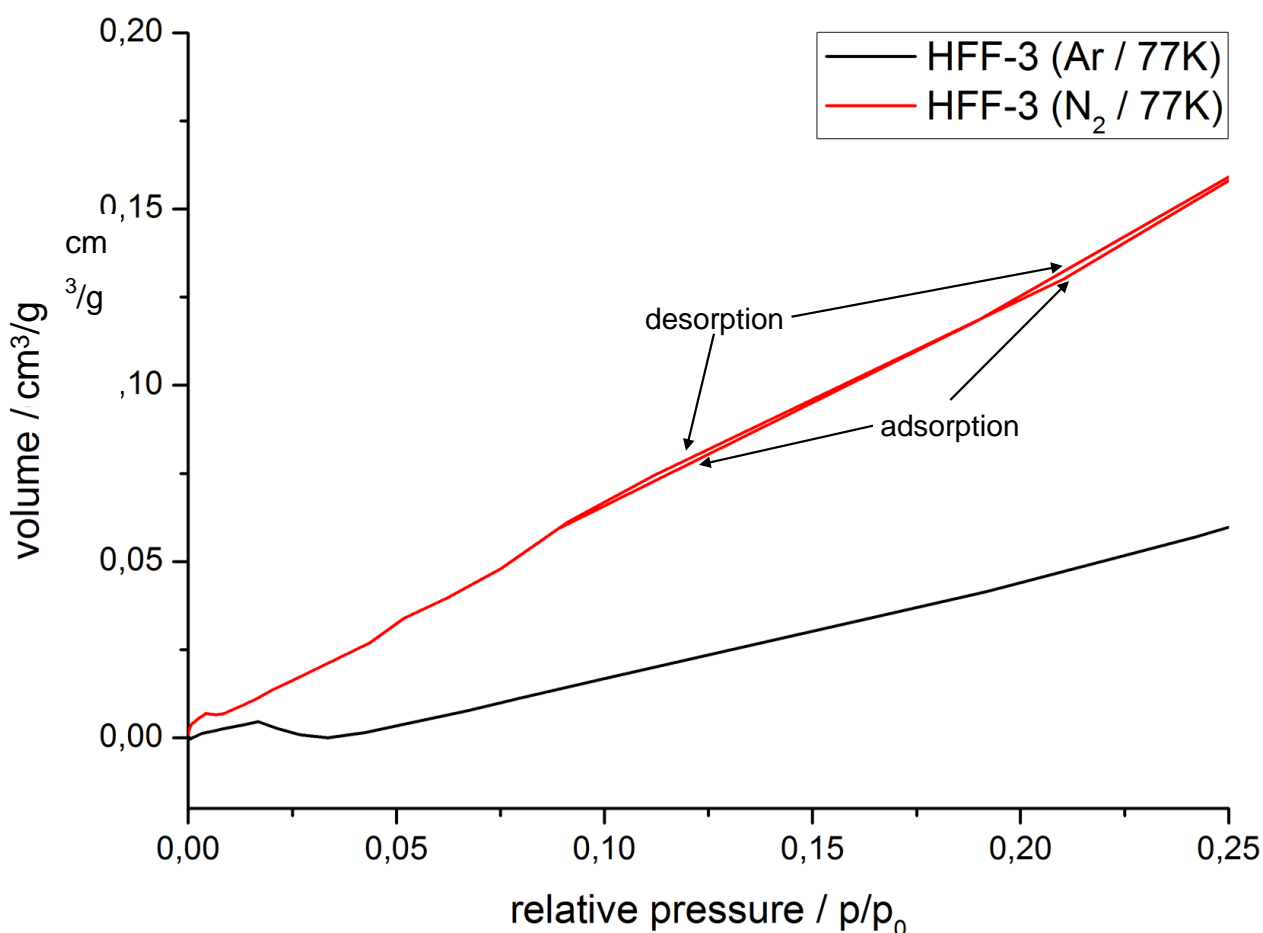

**Figure S14:** Adsorption and desorption isotherms of **HFF-3** for N<sub>2</sub> (red) and Ar adsorption (black) at 77K.

Measured BET surface areas for **HFF-3**: 40 m<sup>2</sup> g<sup>-1</sup> for N<sub>2</sub> and 18 m<sup>2</sup> g<sup>-1</sup> for Ar.

solvent accessible pore volume: 394 Å<sup>3</sup>/unit cell (4.1%) 0.033 cm<sup>3</sup> g<sup>-1</sup>

solvent accessible surface area: 1130 Å<sup>2</sup>/unit cell 958 m<sup>2</sup> g<sup>-1</sup>

Theoretical values calculated with Materials Studio (*Dassault Systèmes BIOVIA, Materials Studios 2016, San Diego: Dassault Systèmes, 2016*) from the crystal structure without Et<sub>2</sub>O molecules.



## 5 Powder X-ray diffraction (PXRD)

Powder diffraction samples were either grinded and put into Lindemann glass capillaries ( $\varnothing$  0.3 mm) for the as-synthesized product or investigated on a plate with dome sample holder for the activated samples. Diffraction data was collected on a BRUKER AXS D8 Discover powder X-ray diffractometer equipped with Lynx-Eye detector in transmission geometry (as-synthesized) and reflection geometry (activated). The X-ray radiation (Cu-K $\alpha$ 1;  $\lambda = 154.06$  pm) was focused with a Goebel mirror, Cu-K $\alpha$ 2 radiation was eliminated by the application of a Ni absorber. Diffraction patterns were recorded and analysed using the program package BRUKER AXS Diffrac-Suite.

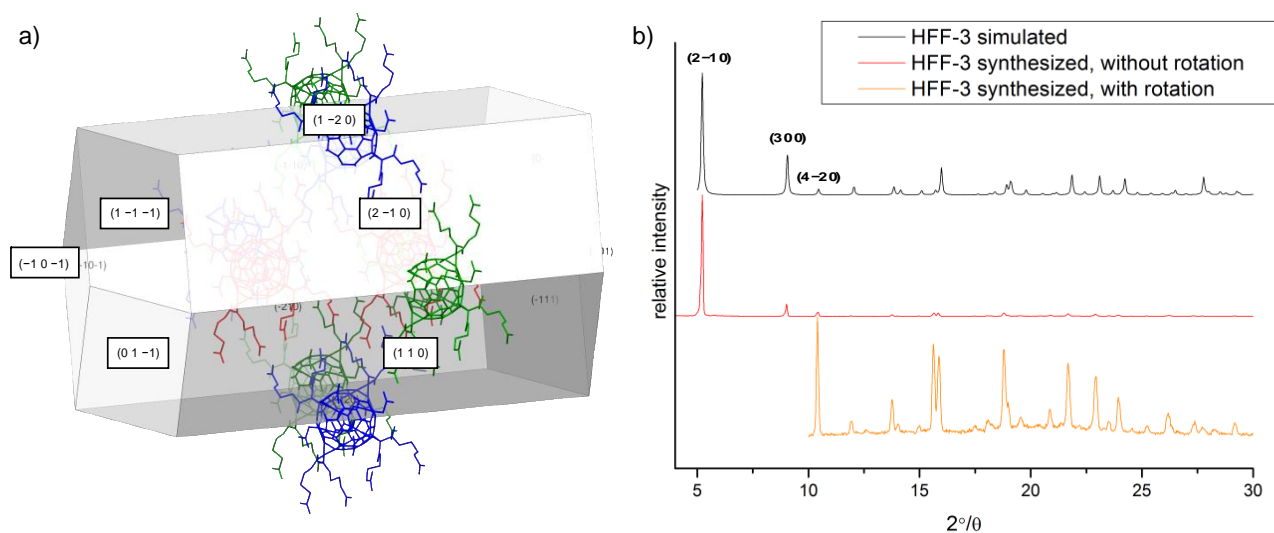

**Figure S15:** a) BFDH morphology as calculated from the crystal structure of **HFF-3**; b) diffraction pattern of **HFF-3** as synthesized (red: measured without rotation, orange: measured without rotation) in comparison with a pattern simulated from single-crystal data (black).

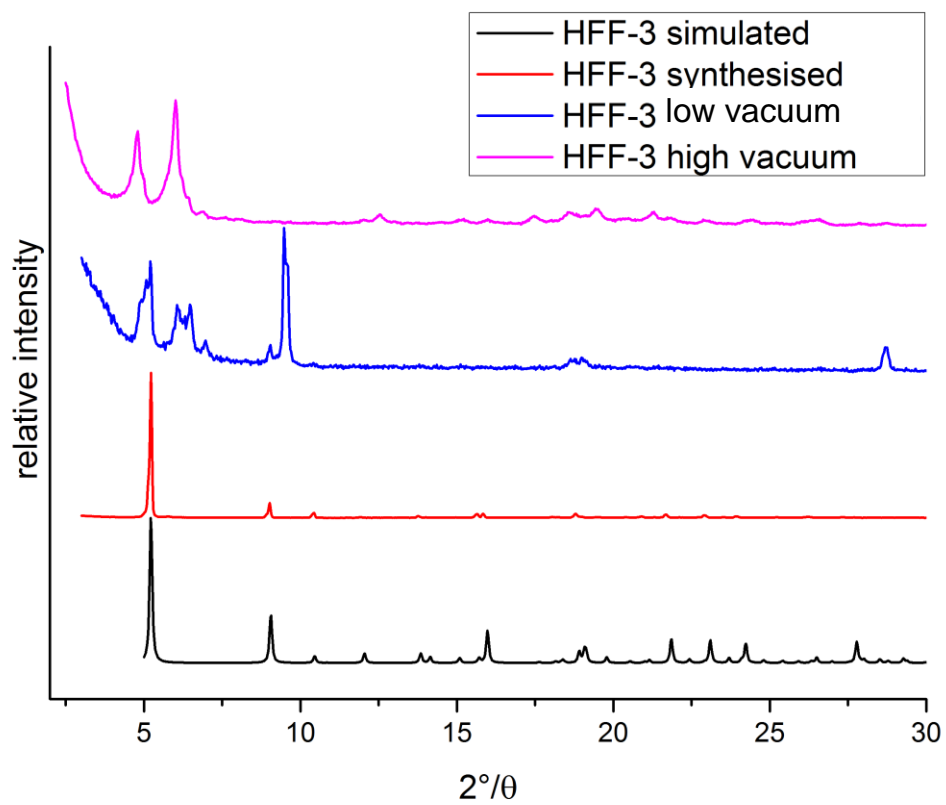

**Figure S16:** Diffraction patterns of **HFF-3** as-synthesized (red) in comparison with a pattern simulated with singly crystal data (black) and subsequent to activation treatment at  $2 \times 10^{-3}$  mbar (blue) and  $1 \times 10^{-6}$  mbar (pink).

## 6 TG/DTA study

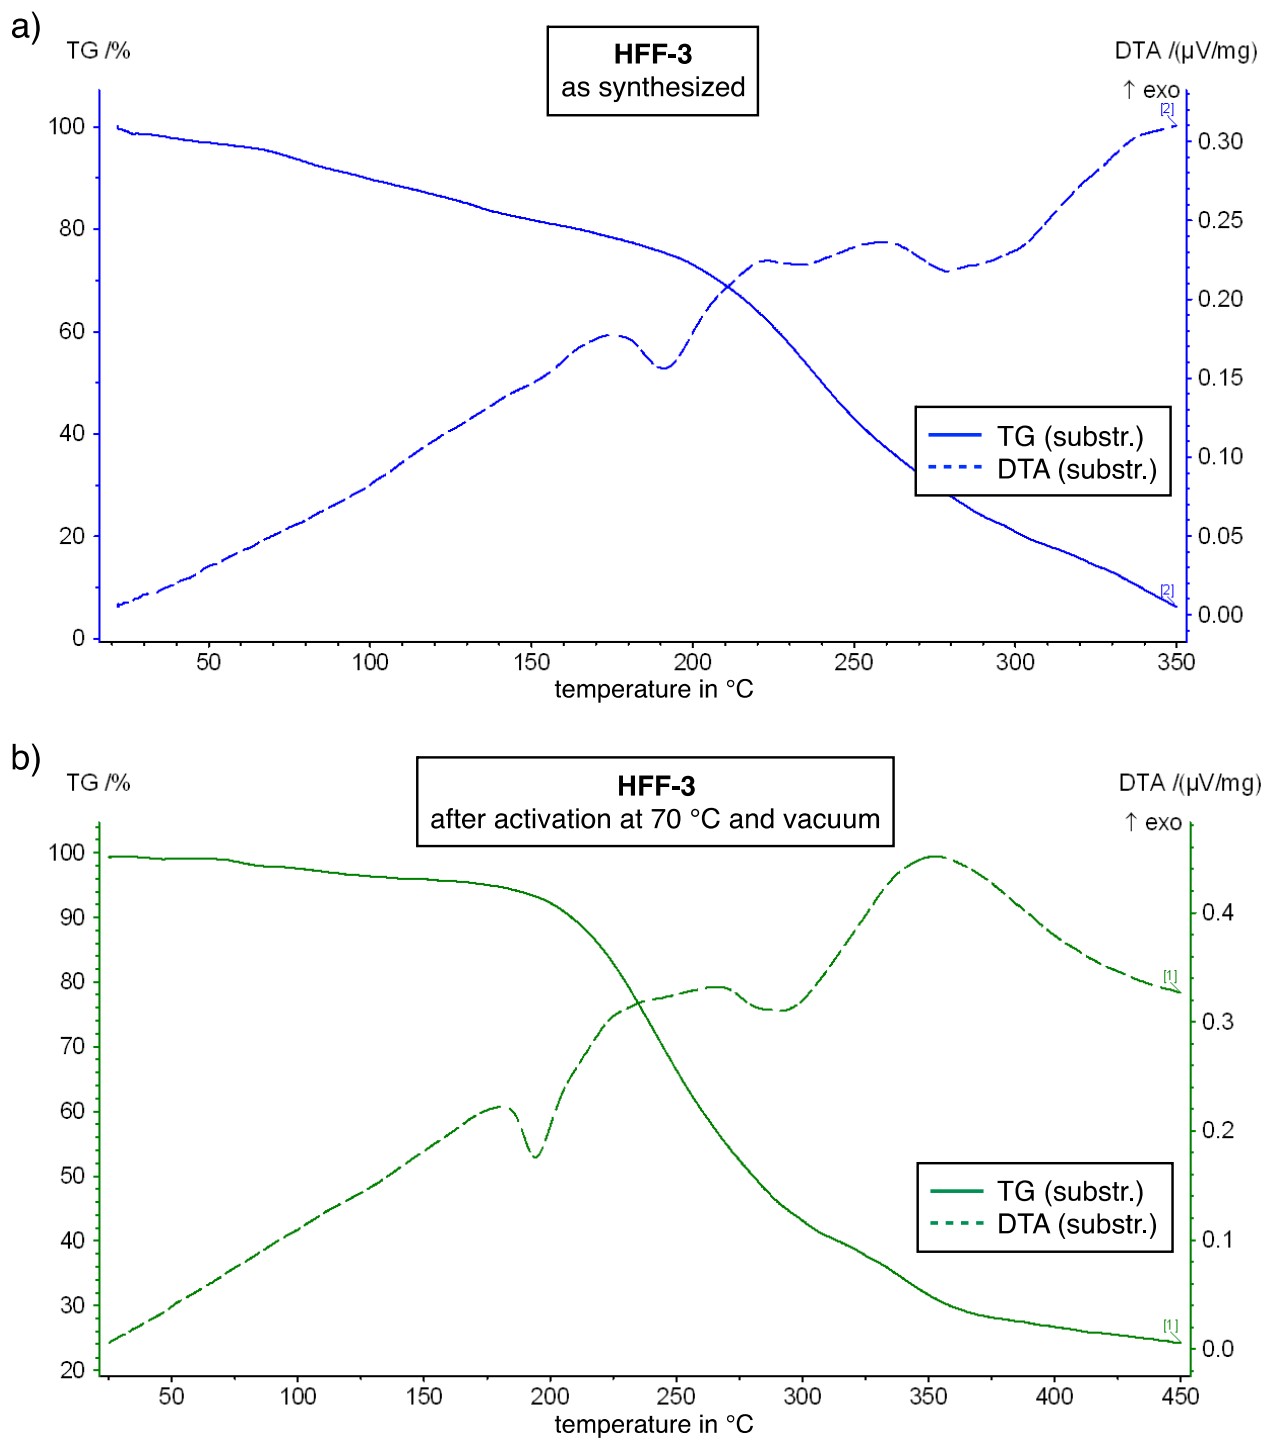

**Figure S17:** TG/DTA study for **HFF-3** a) as synthesized and b) after activation at 70 °C under vacuum.
